# Supplementary material for: Comparing Different Suicide Prevention Measures at Bridges and Buildings: Lessons We Have Learned from a National Survey in Switzerland
Source: PLoS One. 2017 Jan 6;12(1):e0169625. doi: 10.1371/journal.pone.0169625 (PMC5218568; doi:10.1371/journal.pone.0169625)
Supplement: S1 Table — (XLS) [file pone.0169625.s001.xls]

## Sheet: incidents
Location Jump	1990	1991	1992	1993	1994	1995	1996	1997	1998	1999	2000	2001	2002	2003	2004	2005	2006	2007	2008	2009	2010	2011	2012	2013
a	0	2	3	1	0	5	4	3	1	1	8	6	2	4	2	6	4	2	1	1	0	0	1	3
b	Miss	Miss	Miss	Miss	1	1	3	3	2	2	2	2	5	5	4	3	4	3	3	10	0	1	0	0
c	Miss	Miss	Miss	Miss	1	2	1	0	0	1	0	1	4	1	2	4	4	3	6	7	0	3	0	0
d	6	0	2	5	3	3	3	3	2	4	8	3	2	1	2	1	0	2	0	1	0	1	1	2
e	0	0	0	0	1	1	5	2	2	0	1	1	0	3	0	1	3	1	2	1	0	0	0	2
f	0	0	0	1	1	0	0	0	0	0	1	2	2	0	2	0	2	2	1	1	0	1	0	0
g	Miss	Miss	Miss	Miss	Miss	Miss	1	2	2	0	2	0	0	2	0	0	1	1	1	1	1	0	1	0
h	Miss	Miss	Miss	Miss	1	0	1	3	2	2	1	1	0	1	0	0	0	1	0	0	0	0	0	0
i	1	1	0	0	2	1	0	2	0	2	0	1	0	1	2	4	3	2	2	0	1	1	1	1
j	Miss	Miss	Miss	Miss	Miss	*	*	*	*	0	0	0	0	0	0	0	0	0	0	0	0	0	0	0
k	Miss	Miss	Miss	Miss	Miss	Miss	Miss	Miss	Miss	Miss	Miss	0	0	0	3	0	0	1	1	0	3	0	0	0
l	Miss	Miss	Miss	Miss	Miss	Miss	Miss	Miss	Miss	Miss	Miss	0	0	2	1	2	2	2	0	0	2	1	1	1
m	0	0	0	0	2	0	0	0	0	1	0	1	1	0	2	0	0	0	1	0	0	0	0	0
n	3	1	0	0	1	0	0	0	0	1	0	0	0	1	0	1	1	0	0	1	0	0	0	0
o	0	0	0	0	1	1	0	2	0	0	0	0	2	1	1	0	0	0	0	0	0	0	0	1
*Only sum 9 suicides for the 4 years is now

## Sheet: sum suic after intervention
	Intervention		Barrrier	Net	Oberservationtime bevor Intervention (bei genauem Datum Bauphase zu pr_ gez_hlt)	Suicide before Intervention	Observationtime after Intervention	Suicides after Intervention
Location	Type	Extent	Height	Depth	T1	Sui1	T2	Sui2
a	barrier	complete	1.9		215	54	73	6
b	barrier	partial	2.9		192	53	48	1
c	barrier	partial	2.9		192	37	48	3
d	barrier	partial	1.5		167	45	121	10
e	barrier	complete	1.8		246	24	42	2
f	barrier	complete	3.3		264	16	24	0
g	net	complete		4	186	14	30	1
h	barrier	complete	2.6		180	13	60	0
i	net	partial		4	249	25	39	3
j	net	complete		7	48	9	180	0
k	barrier	complete	2.3		131	8	25	0
l	barrier	partial	Miss		122	11	34	3
m	barrier	partial	2.7		156	5	132	3
n	net	partial		0.5	173	7	115	3
o	barrier	partial	1.7		158	6	130	3
